# Supplementary material for: Involving multiple stakeholders in assessing and reviewing a novel data visualisation tool for a national neonatal data asset
Source: HighWire-hosted journal article supplement (doi:10.1136/bmjhci-2022-100694), 2023-01-01
Supplement: bmjhci-2022-100694supp002_data_supplement.pdf [file bmjhci-2022-100694supp002_data_supplement.pdf]

**SUPPLEMENTARY FILE 2**

| <b>Appendix 2 – GRIPP2 long form [9]</b> |                                                                                              |                     |
|------------------------------------------|----------------------------------------------------------------------------------------------|---------------------|
| Section and topic                        | Item                                                                                         | Reported on page No |
| <b>Section 1: Abstract of paper</b>      |                                                                                              |                     |
| 1a: Aim                                  | Report the aim of the study                                                                  | 2                   |
| 1b: Methods                              | Describe the methods used by which patients and the public were involved                     | 6                   |
| 1c: Results                              | Report the impacts and outcomes of PPI in the study                                          | 6-12                |
| 1d: Conclusions                          | Summarise the main conclusions of the study                                                  | 12                  |
| 1e: Keywords                             | Include PPI, “patient and public involvement,” or alternative terms as keywords              | 1                   |
| <b>Section 2: Background to paper</b>    |                                                                                              |                     |
| 2a: Definition                           | Report the definition of PPI used in the study and how it links to comparable studies        | 5                   |
| 2b: Theoretical underpinnings            | Report the theoretical rationale and any theoretical influences relating to PPI in the study | 5                   |
| 2c: Concepts and theory development      | Report any conceptual models or influences used in the study                                 | 5                   |
| <b>Section 3: Aims of paper</b>          |                                                                                              |                     |
| 3: Aim                                   | Report the aim of the study                                                                  | 4, 5                |
| <b>Section 4: Methods of paper</b>       |                                                                                              |                     |

|                                                 |                                                                                                       |      |
|-------------------------------------------------|-------------------------------------------------------------------------------------------------------|------|
| 4a: Design                                      | Provide a clear description of methods by which patients and the public were involved                 | 5    |
| 4b: People involved                             | Provide a description of patients, carers, and the public involved with the PPI activity in the study | 5    |
| 4c: Stages of involvement                       | Report on how PPI is used at different stages of the study                                            | 5    |
| 4d: Level or nature of involvement              | Report the level or nature of PPI used at various stages of the study                                 | 5    |
| Section 5: Capture or measurement of PPI impact |                                                                                                       |      |
| 5a: Qualitative evidence of impact              | If applicable, report the methods used to qualitatively explore the impact of PPI in the study        | n/a  |
| 5b: Quantitative evidence of impact             | If applicable, report the methods used to quantitatively measure or assess the impact of PPI          | n/a  |
| 5c: Robustness of measure                       | If applicable, report the rigour of the method used to capture or measure the impact of PPI           | n/a  |
| Section 6: Economic assessment                  |                                                                                                       |      |
| 6: Economic assessment                          | If applicable, report the method used for an economic assessment of PPI                               | n/a  |
| Section 7: Study results                        |                                                                                                       |      |
| 7a: Outcomes of PPI                             | Report the results of PPI in the study, including                                                     | 6-11 |

|                                       |                                                                                                                                                                                               |              |
|---------------------------------------|-----------------------------------------------------------------------------------------------------------------------------------------------------------------------------------------------|--------------|
|                                       | both positive and negative outcomes                                                                                                                                                           |              |
| 7b: Impacts of PPI                    | Report the positive and negative impacts that PPI has had on the research, the individuals involved (including patients and researchers), and wider impacts                                   | 12, 13       |
| 7c: Context of PPI                    | Report the influence of any contextual factors that enabled or hindered the process or impact of PPI                                                                                          | 5, 6, 12, 13 |
| 7d: Process of PPI                    | Report the influence of any process factors, that enabled or hindered the impact of PPI                                                                                                       | 5, 6         |
| 7ei: Theory development               | Report any conceptual or theoretical development in PPI that have emerged                                                                                                                     | 12, 13       |
| 7eii: Theory development              | Report evaluation of theoretical models, if any                                                                                                                                               |              |
| 7f: Measurement                       | If applicable, report all aspects of instrument development and testing (eg, validity, reliability, feasibility, acceptability, responsiveness, interpretability, appropriateness, precision) | n/a          |
| 7g: Economic assessment               | Report any information on the costs or benefit of PPI                                                                                                                                         | n/a          |
| Section 8: Discussion and conclusions |                                                                                                                                                                                               |              |
| 8a: Outcomes                          | Comment on how PPI influenced the study overall. Describe positive and negative effects                                                                                                       | 12, 13       |
| 8b: Impacts                           | Comment on the different impacts of PPI                                                                                                                                                       | 12, 13       |

|                                           |                                                                                                                                           |        |
|-------------------------------------------|-------------------------------------------------------------------------------------------------------------------------------------------|--------|
|                                           | identified in this study and how they contribute to new knowledge                                                                         |        |
| 8c: Definition                            | Comment on the definition of PPI used (reported in the Background section) and whether or not you would suggest any changes               | 5      |
| 8d: Theoretical underpinnings             | Comment on any way your study adds to the theoretical development of PPI                                                                  | 12, 13 |
| 8e: Context                               | Comment on how context factors influenced PPI in the study                                                                                | 12, 13 |
| 8f: Process                               | Comment on how process factors influenced PPI in the study                                                                                | 12,13  |
| 8g: Measurement and capture of PPI impact | If applicable, comment on how well PPI impact was evaluated or measured in the study                                                      | n/a    |
| 8h: Economic assessment                   | If applicable, discuss any aspects of the economic cost or benefit of PPI, particularly any suggestions for future economic modelling.    | n/a    |
| 8i: Reflections/critical perspective      | Comment critically on the study, reflecting on the things that went well and those that did not, so that others can learn from this study | 12, 13 |
